# Supplementary material for: HEAL‐D Online: Exploring the potential for the spread and adoption of a virtual culturally tailored diabetes self‐management programme for adults of African and Caribbean heritage
Source: PubMed Central journal article supplement (PMC11589399; doi:10.1111/jhn.13396), 2024-11-25
Supplement: JHN-38-0-s003.pdf [file JHN-38-0-s003.pdf]

## 1 Additional File 4: Focus Group Session Plan and Topic Guide

|                                                                                                                                                                                                                                                                                                                                                                                                                                                                                                                                                                                                                                                                                                                                                                                                                                                                                                                                                                                                                                                                 |
|-----------------------------------------------------------------------------------------------------------------------------------------------------------------------------------------------------------------------------------------------------------------------------------------------------------------------------------------------------------------------------------------------------------------------------------------------------------------------------------------------------------------------------------------------------------------------------------------------------------------------------------------------------------------------------------------------------------------------------------------------------------------------------------------------------------------------------------------------------------------------------------------------------------------------------------------------------------------------------------------------------------------------------------------------------------------|
| <b>Registration &amp; refreshments</b><br>Aim: make people feel welcome and comfortable                                                                                                                                                                                                                                                                                                                                                                                                                                                                                                                                                                                                                                                                                                                                                                                                                                                                                                                                                                         |
| <b>Welcome &amp; housekeeping (5 minutes)</b><br>Aim: cover logistics and set ground rules for the day                                                                                                                                                                                                                                                                                                                                                                                                                                                                                                                                                                                                                                                                                                                                                                                                                                                                                                                                                          |
| <b>Introduction (5 minutes)</b><br>Aim: ensure everyone understands the purpose of the session                                                                                                                                                                                                                                                                                                                                                                                                                                                                                                                                                                                                                                                                                                                                                                                                                                                                                                                                                                  |
| <b>Ice breaker (5 minutes)</b><br>Aim: make people feel comfortable and learn a little bit about why everyone decided to join the focus group<br><br>In pairs discuss the following questions, then share your partners answers to the group <ul style="list-style-type: none"><li>• What's your name?</li><li>• How long have you / your relative been living with type 2 diabetes?</li><li>• Have you got any experience of attending a diabetes self-management course?</li></ul><br>Go round group and ask everyone to share their name.                                                                                                                                                                                                                                                                                                                                                                                                                                                                                                                    |
| <b>Main activity (1hr - 1hr15m)</b><br>Aim: discuss perspectives about the provision of online learning in order to understand perceptions of the potential acceptability and implications of a digital model of participation.<br><br><b>1. How would you feel if you were asked to attend a series of online sessions specifically designed to help manage your diabetes?</b><br>Prompts (issues to cover if not mentioned): <ul style="list-style-type: none"><li>• What are your preferences around accessing a self-management course online versus face to face, and why?</li><li>• What are the <i>benefits of attending an online course</i>?</li><li>• What are the <i>challenges of attending an online course</i>?</li><li>• <i>What would encourage you to attend?</i></li><li>• Who would you trust to inform you about the course?</li><li>• What device(s) / technology could you use to attend the session? Can you see any challenges with this?</li></ul><br><b>2. Thinking about HEAL-D specifically, with HEAL-D being delivered over 7</b> |

**weeks, at regular one-week time slots, such as Wednesday at 5pm**

- How would the HEAL-D schedule work for you?
- Would the fact it is online make it more/less easy for you to attend? Why?
- A key element of HEAL-D is that it is live and interactive. *How do you think being online might affect the way you interact with peers / facilitators?*
- If we were planning on rolling out HEAL-D Online outside south London, what other issues would we need to consider?

**3. Finally, is there anything else we have not discussed today that you would like to talk about / mention?**

**Closing remarks (5 minutes)**

Aim: make people feel listened to and valued. Provide key reflections and let them know what will happen next.

**Close**
