# Supplementary material for: HEAL‐D Online: Exploring the potential for the spread and adoption of a virtual culturally tailored diabetes self‐management programme for adults of African and Caribbean heritage
Source: PubMed Central journal article supplement (PMC11589399; doi:10.1111/jhn.13396), 2024-11-25
Supplement: JHN-38-0-s004.pdf [file JHN-38-0-s004.pdf]

## Additional File 5: The HEAL-D Online programme - session learning outcomes, content and materials

| Learning objectives                                                                                                                                                                                                                                                                                                                                                                                                                                                                                                                                                                                                                                                                | Content and materials                                                                                                                                                                                                                                                                                                                                                                                                                                                                                               |
|------------------------------------------------------------------------------------------------------------------------------------------------------------------------------------------------------------------------------------------------------------------------------------------------------------------------------------------------------------------------------------------------------------------------------------------------------------------------------------------------------------------------------------------------------------------------------------------------------------------------------------------------------------------------------------|---------------------------------------------------------------------------------------------------------------------------------------------------------------------------------------------------------------------------------------------------------------------------------------------------------------------------------------------------------------------------------------------------------------------------------------------------------------------------------------------------------------------|
| <b>1. Diabetes – It’s in your hands! An introduction to T2D self-management</b>                                                                                                                                                                                                                                                                                                                                                                                                                                                                                                                                                                                                    |                                                                                                                                                                                                                                                                                                                                                                                                                                                                                                                     |
| <p>Understand what T2D is and how it develops.</p> <p>Understand the role of insulin, glucose and blood glucose in health and T2D.</p> <p>Be introduced to key ways in which diet and lifestyle influence T2D.</p> <p>Understand the principles of a healthy, balanced diet.</p> <p>Understand how to set personal goals.</p>                                                                                                                                                                                                                                                                                                                                                      | <p><i>Diabetes – It’s in your hands</i> slide set</p> <p><i>Getting Started</i> information booklet</p> <p><i>Diabetes Explained</i> information booklet</p> <p><i>Balanced Diet</i> information booklet</p> <p><i>Diabetes Explained</i> animation film</p> <p><i>Diabetes True/False</i> interactive group activity</p> <p><i>Our Objectives</i> interactive group activity</p> <p><i>Tree of Life</i> interactive group activity</p> <p><i>Measuring Your Progress</i> form</p>                                  |
| <b>2. Get Moving!</b>                                                                                                                                                                                                                                                                                                                                                                                                                                                                                                                                                                                                                                                              |                                                                                                                                                                                                                                                                                                                                                                                                                                                                                                                     |
| <p>Understand the importance of physical activity in T2D management.</p> <p>Know the physical activity recommendations for T2D management.</p> <p>Understand the difference between strength training and aerobic exercise and why they are important in T2D.</p> <p>Review HEAL-D activity targets and set personal physical activity goals.</p> <p>Explore personal barriers to engagement in physical activity.</p> <p>Know what physical activity provision is available locally.</p> <p>Learn about the HEAL-D physical activity resources.</p> <p>Explore problem-solving and action planning techniques.</p> <p>Participate in a group-based physical activity session.</p> | <p><i>Get Moving!</i> slide set</p> <p><i>Get Moving!</i> information booklet</p> <p><i>Overcoming Barriers</i> interactive group discussion</p> <p><i>Get Moving!</i> patient stories film</p> <p><i>Step It Out</i> homework card</p> <p>Pedometer</p> <p>HEAL-D home exercise videos &amp; exercise band</p> <p>Virtual group exercise session – Resistance bands</p>                                                                                                                                            |
| <b>3. Taking Control!</b>                                                                                                                                                                                                                                                                                                                                                                                                                                                                                                                                                                                                                                                          |                                                                                                                                                                                                                                                                                                                                                                                                                                                                                                                     |
| <p>Know different types of carbohydrate and food sources of these.</p> <p>Understand how carbohydrate foods affect blood glucose.</p> <p>Know carbohydrate content of commonly consumed foods.</p> <p>Know appropriate portion sizes of carbohydrate foods.</p> <p>Review the role of insulin in blood glucose control.</p> <p>Participate in a group-based physical activity session.</p>                                                                                                                                                                                                                                                                                         | <p><i>Step It Out</i> homework feedback</p> <p><i>Taking Control!</i> slide set</p> <p><i>Taking Control!</i> information booklet</p> <p><i>Identifying Carbohydrates</i> group discussion</p> <p><i>Taking Control!</i> patient stories film</p> <p><i>Sugar Cube Game</i> interactive group activity</p> <p><i>Overcoming Barriers</i> interactive group discussion</p> <p>Carbohydrate portion guide handout</p> <p><i>Take Control</i> homework card</p> <p>Virtual group exercise session – dance aerobics</p> |

|                                                                                                                                                                                                                                                                                                                                                                                                                                                                                                                      |                                                                                                                                                                                                                                                                                                                                                            |
|----------------------------------------------------------------------------------------------------------------------------------------------------------------------------------------------------------------------------------------------------------------------------------------------------------------------------------------------------------------------------------------------------------------------------------------------------------------------------------------------------------------------|------------------------------------------------------------------------------------------------------------------------------------------------------------------------------------------------------------------------------------------------------------------------------------------------------------------------------------------------------------|
| <p><b>4. Shape Up!</b></p> <p>Understand how weight and shape influence T2D.<br/> Understand that reducing waist circumference is beneficial for T2D management.<br/> Learn about and experience mindful eating.<br/> Participate in a group-based physical activity session.</p>                                                                                                                                                                                                                                    | <p><i>Take Control</i> homework feedback<br/> <i>Shape Up!</i> slide set<br/> <i>Shape Up!</i> information booklet<br/> <i>Middle Measurements</i> interactive group activity<br/> <i>Mindful Eating</i> homework card<br/> Tape measures<br/> Virtual group exercise session – Circuit training</p>                                                       |
| <p><b>5. Drop the Pressure!</b></p> <p>Understand how salt and saturated fat affect cardiovascular health.<br/> Understand what foods monounsaturated fats and n-3 polyunsaturated fats are found in.<br/> Understand the importance of vegetables for heart health.<br/> Know the salt content of common foods and hidden sources of salt in the diet.<br/> Understand the importance of physical activity and weight management for heart health.<br/> Participate in a group-based physical activity session.</p> | <p><i>Mindful Eating</i> homework feedback<br/> <i>Drop the Pressure!</i> slide set<br/> <i>Drop the Pressure!</i> information booklet<br/> <i>Finding Salt</i> interactive group activity<br/> <i>Try a New Activity</i> homework card<br/> Virtual group exercise session – flex &amp; stretch</p>                                                       |
| <p><b>6. Putting it into Practice: cook &amp; taste</b></p> <p>Learn techniques for cooking with less salt and oil.<br/> Learn techniques for adding extra vegetables into the diet.<br/> Learn techniques for reducing saturated fat in the diet.<br/> Learn techniques for reducing carbohydrate portion sizes.<br/> Take part in a cook and taste session.<br/> Taste foods/dishes prepared with reduced salt and fat.<br/> Taste foods/dishes prepared with increased vegetables.</p>                            | <p><i>Try a New Activity</i> homework feedback<br/> <i>Putting it into Practice</i> information booklet<br/> Virtual cooking stations for increasing vegetables, low fat/healthy fat, reducing salt, reducing carbohydrate, increasing fibre.<br/> Preparing low salt seasonings station.<br/> <i>Diabetes Friendly Cooking</i> homework card</p>          |
| <p><b>7. Plans for Life</b></p> <p>Reflect on successes of HEAL-D programme.<br/> Identify situations which may cause lapses.<br/> Identify tools to manage challenging self-management situations.<br/> Participate in a group-based physical activity session.</p>                                                                                                                                                                                                                                                 | <p><i>Diabetes Friendly Cooking</i> homework feedback<br/> <i>Plans for Life</i> slide set<br/> <i>What We've Learnt</i> interactive group quiz<br/> <i>Managing Lapses</i> interactive group discussion<br/> <i>Celebrating Successes</i> interactive group discussion<br/> HEAL-D certificates of participation<br/> Group exercise session – Zumba™</p> |
